# Supplementary material
Source: HighWire-hosted journal article supplement (https://svn.bmj.com/content/8/3/194)
Supplement: inline-supplementary-material-1 [file inline-supplementary-material-1.pdf]

**Supplemental Table:** Underlying etiology of carotid free-floating thrombus.

| <b>Etiology</b>                                | <b>N (%)</b> | <b>Degree of underlying stenosis</b>                                  |
|------------------------------------------------|--------------|-----------------------------------------------------------------------|
| Atherosclerotic plaque                         | 66 (79.5%)   | 33/66 $\geq$ 50% stenosis<br>32/66 < 50% stenosis<br>1/66 occlusion   |
| Atherosclerotic plaque and atrial fibrillation | 10 (12.0%)   | 7/10 $\geq$ 50% stenosis<br>2/10 < 50% stenosis<br>1/10 ICA occlusion |
| Carotid dissection                             | 4 (4.8%)     | 1/4 $\geq$ 50% stenosis<br>3/4 < 50% stenosis                         |
| ESUS                                           | 3 (3.6%)     | n/a                                                                   |

ICA = internal carotid artery, ESUS = embolic stroke of uncertain source
